# Supplementary material for: Structural implications of Ca2+-dependent actin-bundling function of human EFhd2/Swiprosin-1
Source: PubMed Central journal article supplement (PMC5156911; doi:10.1038/srep39095), 2016-12-15
Supplement: srep39095-s1.pdf [file srep39095-s1.pdf]

## Supplementary Information

### Structural implications of Ca<sup>2+</sup>-dependent actin-bundling function of human EFhd2/Swiprosin-1

Kyoung Ryoung Park<sup>1,2\*</sup>, Min-Sung Kwon<sup>1\*</sup>, Jun Yop An<sup>1,2</sup>, Jung-Gyu Lee<sup>1,2</sup>, Hyung-Seop Youn<sup>1,2</sup>, Youngjin Lee<sup>1,2</sup>, Jung Youn Kang<sup>1,2</sup>, Tae Gyun Kim<sup>1,2†</sup>, Jia Jia Lim<sup>1,2</sup>, Jeong Soon Park<sup>3</sup>, Sung Haeng Lee<sup>4</sup>, Woo Keun Song<sup>1</sup>, Hae-Kap Cheong<sup>3</sup>, Chang-Duk Jun<sup>1</sup> & Soo Hyun Eom<sup>1,2</sup>

<sup>1</sup>School of Life Science, Gwangju Institute of Science and Technology (GIST), 123 Cheomdangwagi-ro, Buk-gu, Gwangju 61005, Republic of Korea. <sup>2</sup>Steitz Center for Structural Biology and Department of Chemistry, Gwangju Institute of Science and Technology (GIST), 123 Cheomdangwagi-ro, Buk-gu, Gwangju 61005, Republic of Korea. <sup>3</sup>Protein Structure Group, Korea Basic Science Institute, 162 Yeongudanji-Ro, Ochang 363-883, Republic of Korea. <sup>4</sup>Department of Cellular and Molecular Medicine, Chosun University School of Medicine, 375 Seosuk-dong, Dong-gu, Gwangju 501-759, Republic of Korea

\*These authors contributed equally to this work.

† Current address: Molecular Cryo-Electron Microscopy Unit, Okinawa Institute of Science and Technology Graduate University, 1919-1 Tancha, Onna, Kunigami, Okinawa 904-0495, Japan.

Correspondence and requests for materials should be addressed to S.H.E. (email: eom@gist.ac.kr)

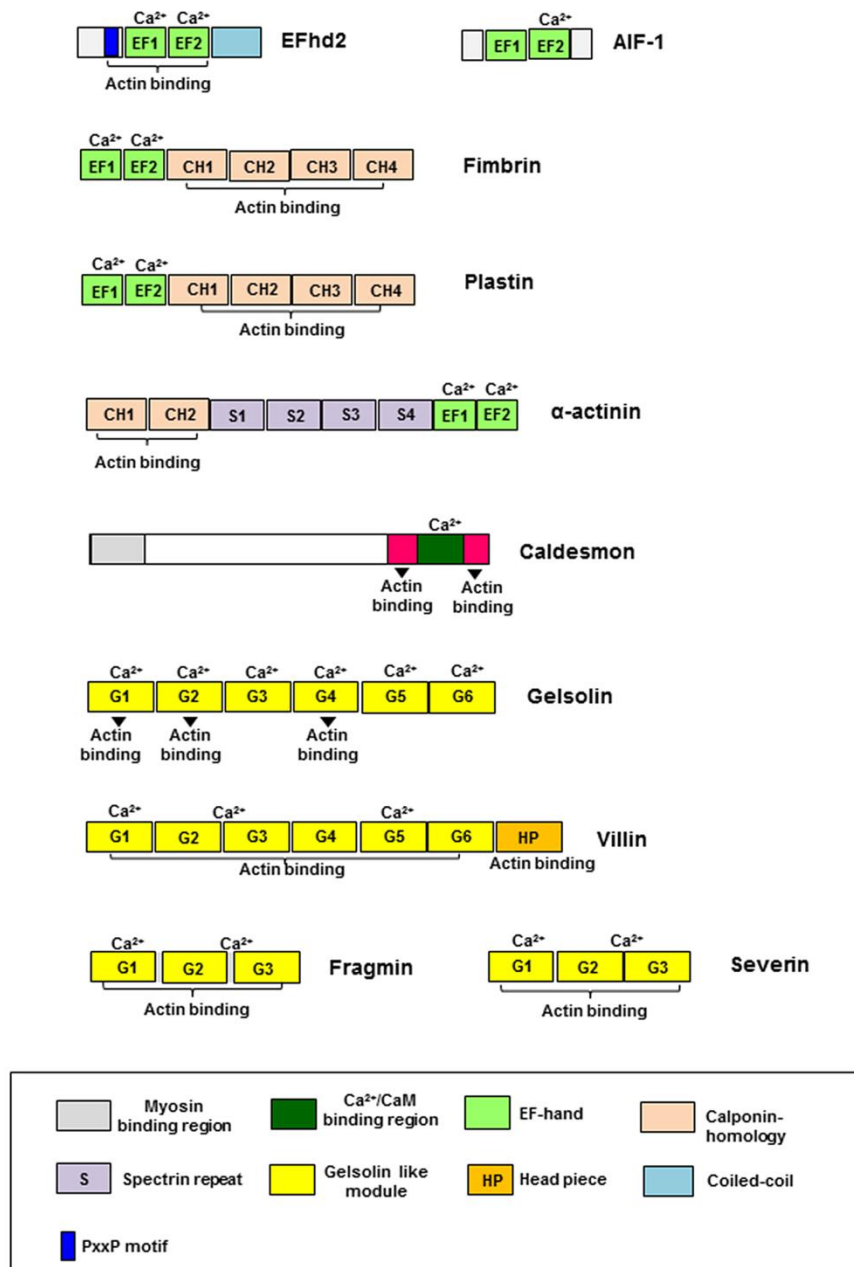

**Supplementary Figure S1. Domain structures of Ca<sup>2+</sup>-related actin-binding proteins.**

Schematic showing the domain organisation of Ca<sup>2+</sup>-related actin-binding proteins. CH domains and gelsolin repeat modules function as actin-binding regions. EF-hands and the CaM-binding region function as Ca<sup>2+</sup>-binding regions; however, EF1 of AIF-1 does not bind to Ca<sup>2+</sup> and the actin-binding site of AIF-1 is unclear.

**a**

```

EFhd2_Human   MATDELATKLSRRRLQMEGEGGGTPEQPLNG...AAAAAAGA...PDEAAEALG.SADCELSAKLLRRAD.LNQGIGF
EFhd2_Monkey  MATDELATKLSRRRLQMEGEGGGTPEQPLNGAA...AAAAAAGA...PDEAAEALG.SADCELSAKLLRRAD.LNQGIGF
EFhd2_Rat     MATDELASKLSRRRLQMEDEGG.EATEQPLNG...AAAAAAGA...PDETAQALG.SADDELSAKLLRRAD.LNQGIGF
EFhd2_Mouse   MATDELASKLSRRRLQMEDEGG.EATEQPLNGA...AAAAAAGA...PDETAQALG.SADDELSAKLLRRAD.LNQGIGF
EFhd2_Zebrafish MATDELSKLSRRRLKIE.DGSHEPAA...ALDEAHEN.GAHDKPTTS...SADSELSAKLLRRAD.LNQGIGF
EFhd1_Human   MASEELACKLERRLR...REEAEESGPQL...APLGAPAPPEPKP.EPEPPARAPTASADAELSAQLSRRLD.INEGAARP
EFhd1_Monkey  MASEELACKLERRLR...REEAEESGPQL...APLGAPAPPEPKP.EPEPPARAPTASADAELSAQLSRRLD.INEGAARP
EFhd1_Rat     MSSEELACKLQRRRLRELETRAETHQDQPQA...APCTAPAGHR...EPEPPAPAPTASADSELNKLSRRLD.IHQGAVRS
EFhd1_Mouse   MSSEELACKLQRRRLRELETRAETHQDQPQA...APCTAPAGHR...EPEPPAPAPTASADSELNKLSRRLD.IHQGTARP
EFhd1_Zebrafish MSSEELARKLQRRRLD...ADTNPG...TQDEET...PVKPAITMSDDTSELTSLNRRLD.LDGTAKP
AIF-1_Human   .....ADTNPG...TQDEET...MSQTRDLQGGKAFGLLKAQQEERLDEINQKFLDD
AIF-1_Monkey  .....ADTNPG...TQDEET...MSQTRDLQGGKAFGLLKAQQEERLDEINQKFLDD
AIF-1_Rat     .....ADTNPG...TQDEET...MSQSKDLQGGKAFGLLKAQQEERLDGINKFLDD
AIF-1_Mouse   .....ADTNPG...TQDEET...MSQSKDLQGGKAFGLLKAQQEERLDGINKFLDD
AIF-1_Zebrafish .....ADTNPG...TQDEET...MPSNMDLQGGKAFGLLKAQQERLDEINQKFMED
  
```

..... PxxP EF-hand 1 EF-hand 2

```

EFhd2_Human   QSPSRRVFNPTTFKQFSRQIKDMEKMFQYDAGRGGFIDLMELKLMMEKLGAPCPTHLGLKSMIKEVDEDFDGLKSFREIL
EFhd2_Monkey  QSPSRRVFNPTTFKQFSRQIKDMEKMFQYDAGRGGFIDLMELKLMMEKLGAPCPTHLGLKSMIKEVDEDFDGLKSFREIL
EFhd2_Rat     QSPSRRVFNPTTFKQFSRQIKDMEKMFQYDAGRGGFIDLMELKLMMEKLGAPCPTHLGLKSMIKEVDEDFDGLKSFREIL
EFhd2_Mouse   QSPSRRVFNPTTFKQFSRQIKDMEKMFQYDAGRGGFIDLMELKLMMEKLGAPCPTHLGLKSMIKEVDEDFDGLKSFREIL
EFhd2_Zebrafish QSPSRRVFNPTTFKQFSRQIKDMEKMFQYDAGRGGFIDLMELKLMMEKLGAPCPTHLGLKSMIKEVDEDFDGLKSFREIL
EFhd1_Human   RR...SRVFNPTTFKQFSRRLIKDLESMPKLYDAGRGGFIDLMELKLMMEKLGAPCPTHLGLKSMIKEVDEDFDGLKSFREIL
EFhd1_Monkey  RR...SRVFNPTTFKQFSRRLIKDLESMPKLYDAGRGGFIDLMELKLMMEKLGAPCPTHLGLKSMIKEVDEDFDGLKSFREIL
EFhd1_Rat     GR...SKVFNPTTFKQFSRRLIKDLESMPKLYDAGRGGFIDLMELKLMMEKLGAPCPTHLGLKSMIKEVDEDFDGLKSFREIL
EFhd1_Mouse   GR...SKVFNPTTFKQFSRRLIKDLESMPKLYDAGRGGFIDLMELKLMMEKLGAPCPTHLGLKSMIKEVDEDFDGLKSFREIL
EFhd1_Zebrafish KQ...MKVFNPTTFKQFSRRLIKDLESMPKLYDAGRGGFIDLMELKLMMEKLGAPCPTHLGLKSMIKEVDEDFDGLKSFREIL
AIF-1_Human   PK.....YSDEDLPSK.LEGFKEKYMEDLNGNGDIDMSLKRMLEKLGVPKPTHLGLKSMIKEVDEDFDGLKSFREIL
AIF-1_Monkey  PK.....YSDEDLPSK.LEGFKEKYMEDLNGNGDIDMSLKRMLEKLGVPKPTHLGLKSMIKEVDEDFDGLKSFREIL
AIF-1_Rat     PK.....YSDEDLPSK.LEAFKVKYMERDLNGNGDIDMSLKRMLEKLGVPKPTHLGLKSMIKEVDEDFDGLKSFREIL
AIF-1_Mouse   PK.....YSDEDLPSK.LEAFKVKYMERDLNGNGDIDMSLKRMLEKLGVPKPTHLGLKSMIKEVDEDFDGLKSFREIL
AIF-1_Zebrafish QK.....YRDEEDLPEK.LDSFNKMYAEDLNDQGEIDMSLKRMLEKLGVPKPTHLGLKSMIKEVDEDFDGLKSFREIL
  
```

linker LM Coiled-coil 240

```

EFhd2_Human   LIFRKAAGELQEDSGLCVLARLSEIDVSTEGVKGAKSFFFEAKVQAINVSSRFEIKAQERKQAEEMKQRKAFAFKELQSTFK.
EFhd2_Monkey  LIFRKAAGELQEDSGLCVLARLSEIDVSTEGVKGAKSFFFEAKVQAINVSSRFEIKAQERKQAEEMKQRKAFAFKELQSTFK.
EFhd2_Rat     LIFRKAAGELQEDSGLHVLARLSEIDVSTEGVKGAKNFFFEAKVQAINVSSRFEIKAQERKQAEEMKQRKAFAFKELQSTFK.
EFhd2_Mouse   LIFRKAAGELQEDSGLHVLARLSEIDVSTEGVKGAKNFFFEAKVQAINVSSRFEIKAQERKQAEEMKQRKAFAFKELQSTFK.
EFhd2_Zebrafish LIFRKAAGELQEDSGLHVLARLSEIDVSTEGVKGAKNFFFEAKVQAINVSSRFEIKAQERKQAEEMKQRKAFAFKELQSTFK.
EFhd1_Human   LIFRKAAGELQEDSGLMALAKLSEIDVLEGVKGAKNFFFEAKVQALSASKFAELKARQDERKREERLRQAFAFKELQANFNT.
EFhd1_Monkey  LIFRKAAGELQEDSGLMALAKLSEIDVLEGVKGAKNFFFEAKVQALSASKFAELKARQDERKREERLRQAFAFKELQANFNT.
EFhd1_Rat     LIFRKAAGELQEDSGLLALAKFSEIDVLEGVGAKNFFFEAKQAALACSSKFAELKARQDERKREERLRQAFAFKELQAFAF.
EFhd1_Mouse   LIFRKAAGELQEDSGLLALAKFSEIDVLEGVGAKNFFFEAKQAALACSSKFAELKARQDERKREERLRQAFAFKELQAFAF.
EFhd1_Zebrafish LIFRKAAGELQEDSGLMALARLSEIDVSTEGVLGARDFFEAKQAALSVRSKFAELREQDERKREERLRQAFAFKELQSTFCS.
AIF-1_Human   RMMLGKRS.....AILKMILMYEKAR.EKXKPTGPPAKKAISELP.....
AIF-1_Monkey  RMMLGKRS.....AILKMILMYEKAR.EKXKPTGPPAKKAISELP.....
AIF-1_Rat     RMMLGKRS.....AILRMILMYEKAR.EKXKPTGPPAKKAISELP.....
AIF-1_Mouse   RMMLGKRS.....AILRMILMYEKAR.EKXKPTGPPAKKAISELP.....
AIF-1_Zebrafish XMMLGKRS.....AVLKLVMYDKANGSKXKPDGPPPKRDIITSLP.....
  
```

**b**

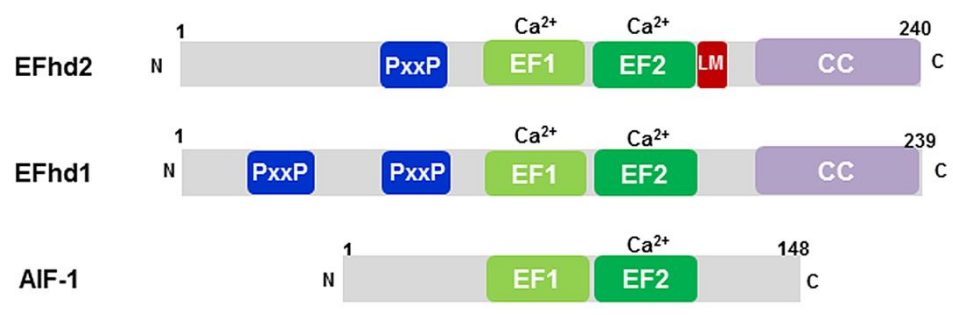

**Supplementary Figure S2. Comparison of the domain organisation of EFhd2, EFhd1 and AIF-1.** The multiple sequence alignment was carried out using the ENDscript server<sup>71</sup>. PxxP : proline-rich region; EF: EF-hands; LM: ligand mimic; CC: coiled-coil. The disordered region of the PX domain in the crystal structure of <sub>CD</sub>EFhd2 is shown by the blue dashed line.

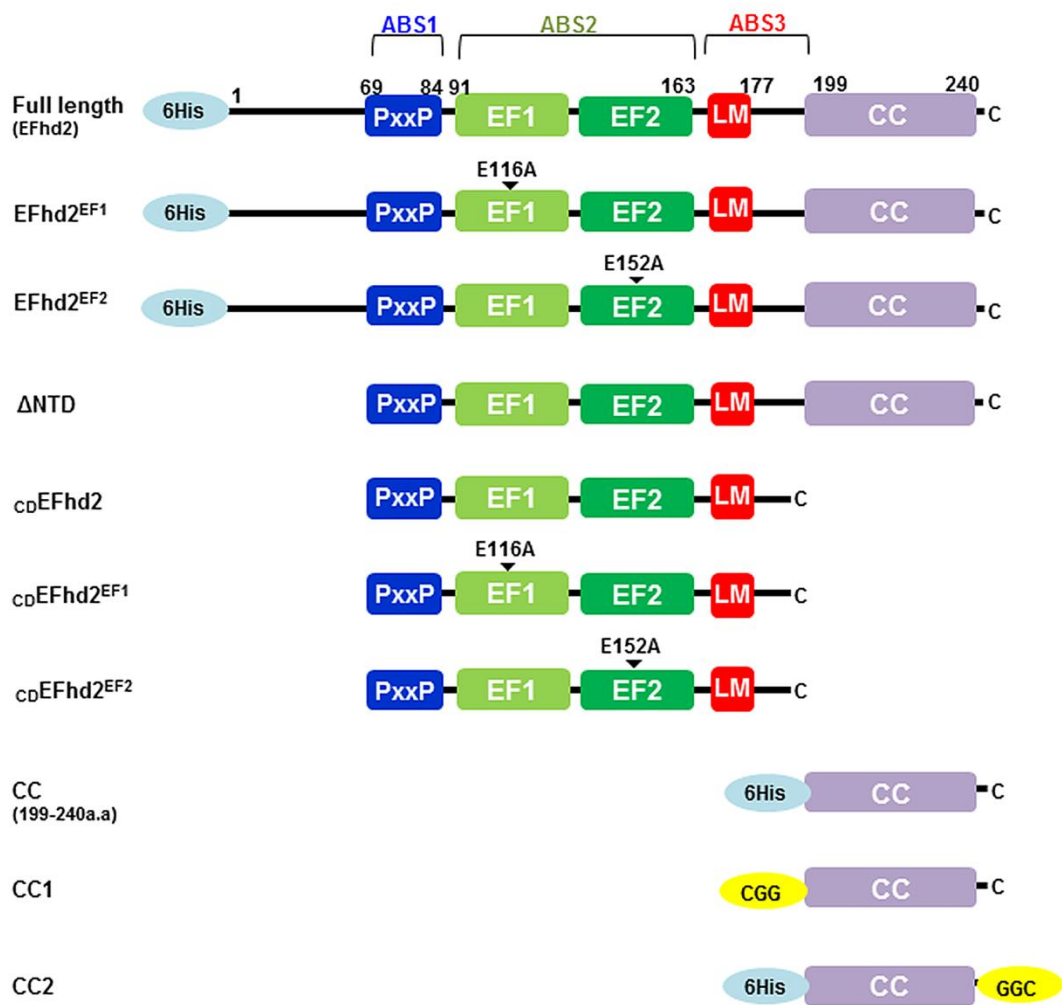

**Supplementary Figure S3. Schematic of the EFhd2 constructs.**

**a**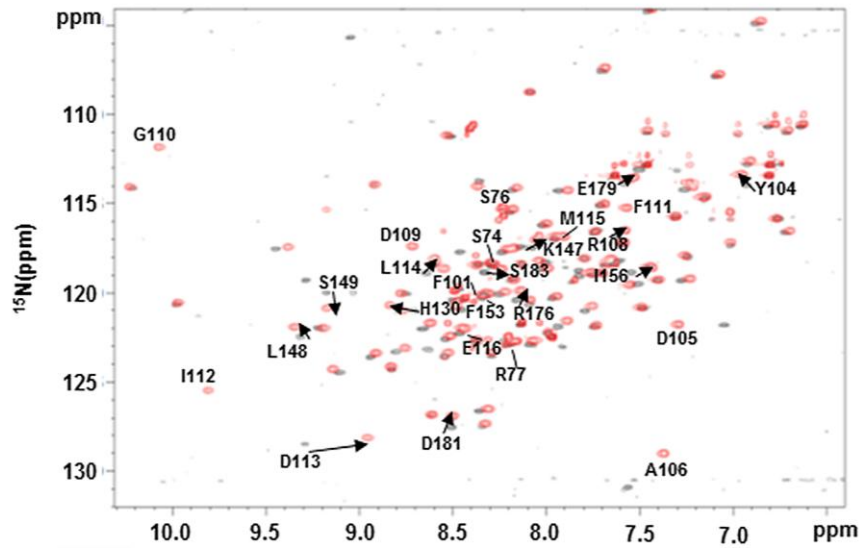**b**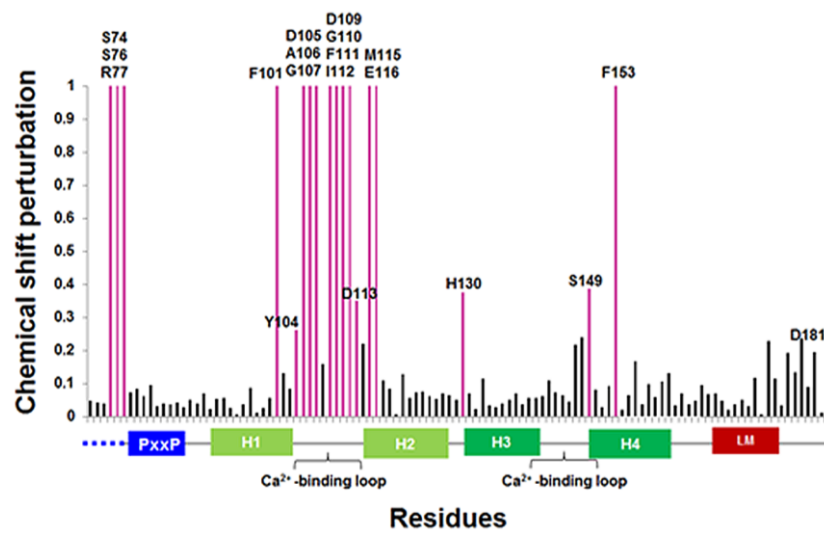**c**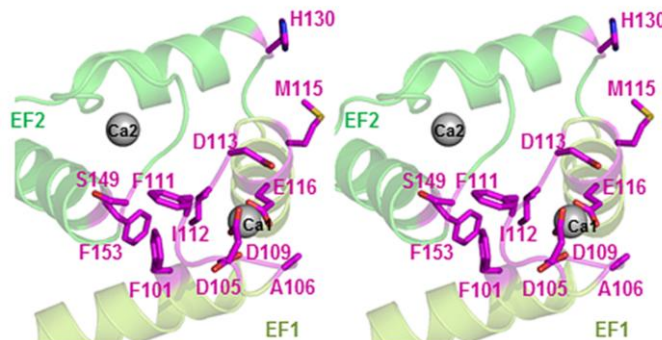

**Supplementary Figure S4. Structural characteristics of  $_{CD}EFhd2$  in the absence of  $Ca^{2+}$ .**

(a) 2D  $^1H$ - $^{15}N$  HSQC spectra of  $_{CD}EFhd2$  in the presence or absence of  $Ca^{2+}$ . The chemical

shifts are monitored in  $^1\text{H}$ ,  $^{15}\text{N}$  correlation spectra. The resonances of  $_{\text{CD}}\text{EFhd2}$  in the presence of  $\text{Ca}^{2+}$  are shown in red and resonances arising from  $_{\text{CD}}\text{EFhd2}$  in the absence of  $\text{Ca}^{2+}$  are shown in black. Residues disappearing (set  $\Delta\delta = 1$  ppm) or showing significant changes in chemical shifts ( $\Delta\delta \geq 0.2$  ppm) upon addition of  $\text{Ca}^{2+}$  are labelled. **(b)** Chemical shift perturbation (CSP) analysis of  $_{\text{CD}}\text{EFhd2}$  in the presence or absence of  $\text{Ca}^{2+}$ . The disordered region of the PxxP motif in the crystal structure of  $_{\text{CD}}\text{EFhd2}$  is shown by the blue dashed line. **(c)** Representation of the perturbed residues (shown as stick in magenta) in the crystal structure of  $_{\text{CD}}\text{EFhd2}$ .

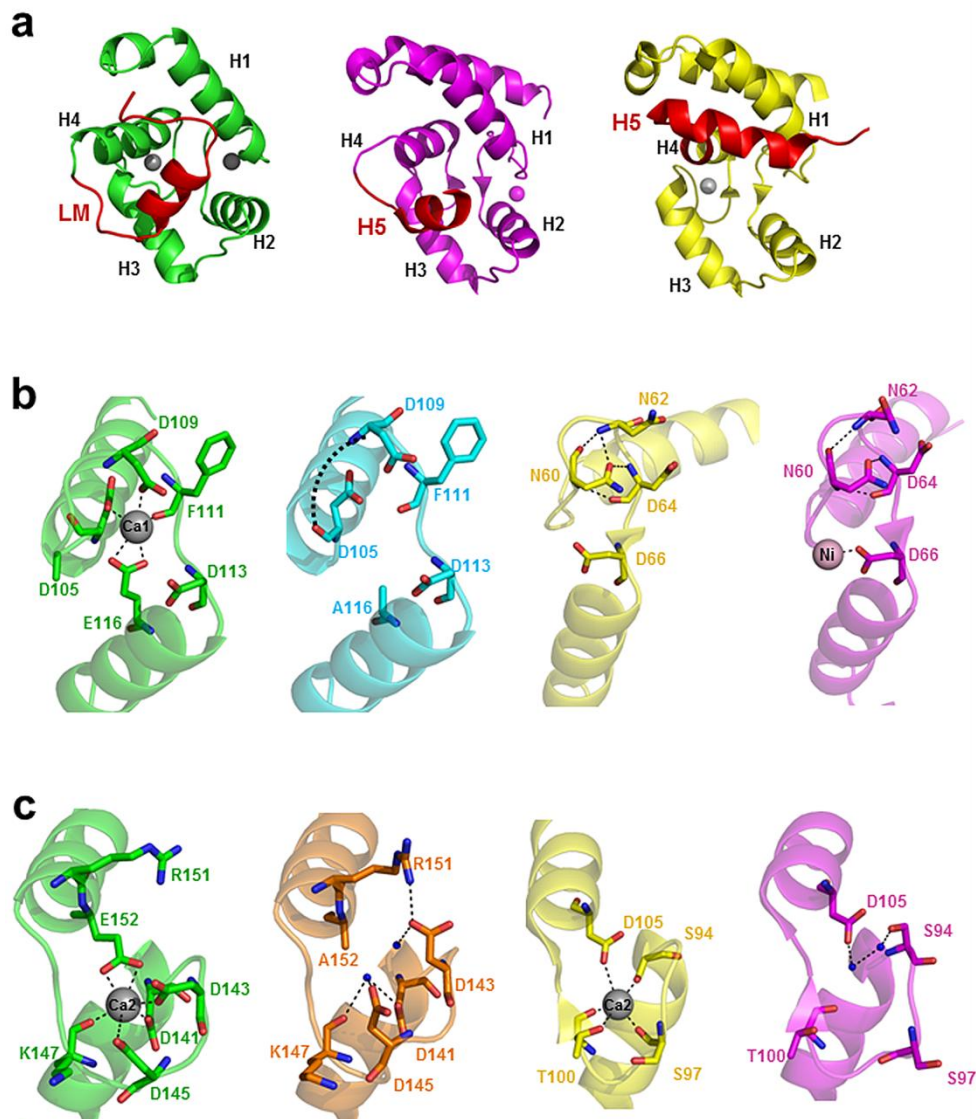

**Supplementary Figure S5. Structural comparison between  $\text{CD}\epsilon\text{Fhd2}$  with homologous protein, AIF-1.** (a) Structures of  $\text{Ca}^{2+}$ -bound  $\text{CD}\epsilon\text{Fhd2}$  (green),  $\text{Ca}^{2+}$ -free AIF-1 (PDB ID: 2D58, magenta) and  $\text{Ca}^{2+}$ -bound AIF-1 (PDB ID: 1WY9, yellow)<sup>35</sup>. Grey and magenta spheres indicate calcium and nickel ions, respectively. (b)  $\text{Ca}^{2+}$ -binding loop of EF1 of the  $\text{Ca}^{2+}$ -bound  $\text{CD}\epsilon\text{Fhd2}$  (green),  $\text{CD}\epsilon\text{Fhd2}^{\text{EF1}}$  (cyan),  $\text{Ca}^{2+}$ -bound AIF-1 (yellow) and  $\text{Ca}^{2+}$ -free AIF-1 (magenta). (c)  $\text{Ca}^{2+}$ -binding loop of EF2 of the  $\text{Ca}^{2+}$ -bound  $\text{CD}\epsilon\text{Fhd2}$  (green),  $\text{CD}\epsilon\text{Fhd2}^{\text{EF2}}$  (orange),  $\text{Ca}^{2+}$ -bound AIF-1 (yellow) and  $\text{Ca}^{2+}$ -free AIF-1 (magenta). Blue spheres indicate water molecules.

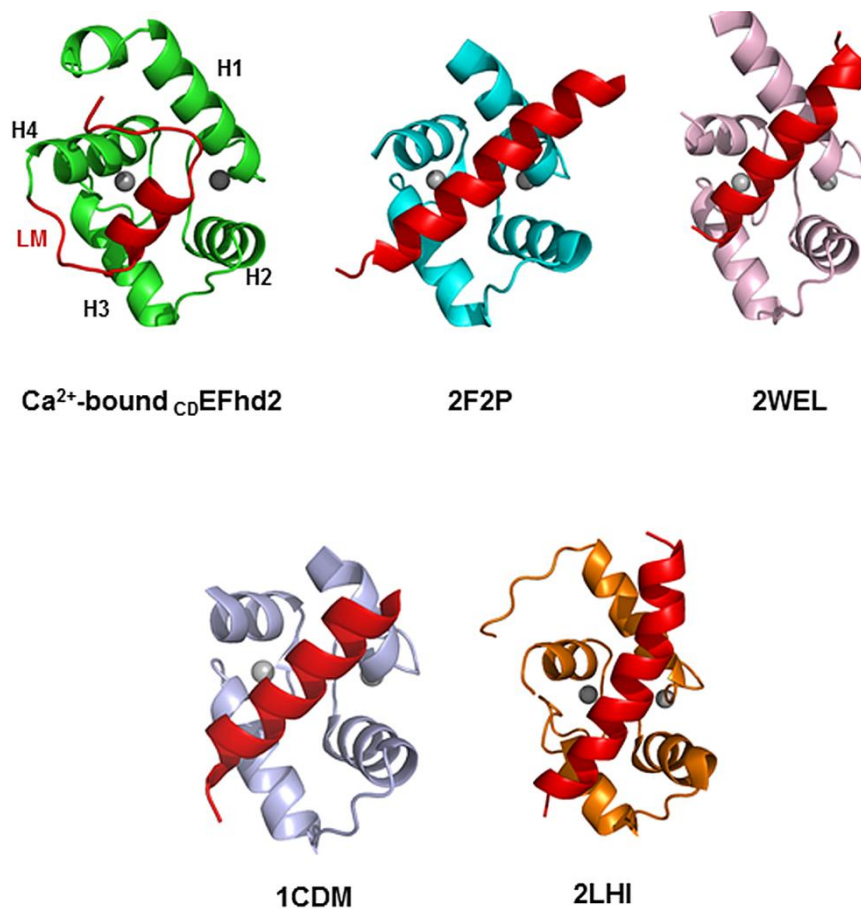

**Supplementary Figure S6. Structural comparison between <sub>CD</sub>EFhd2 and EF-hand-containing proteins.** Structure of Ca<sup>2+</sup>-bound <sub>CD</sub>EFhd2 (green) and CaM with the target peptide complex (PDB ID: 2F2P, 2WEL, 1CDM and 2LHI)<sup>38-41</sup>. Red ribbon diagram shows the LM of the <sub>CD</sub>EFhd2 and target peptides of CaM. Silver spheres indicate Ca<sup>2+</sup> ions. A search for structures similar to <sub>CD</sub>EFhd2 using the Dali program<sup>37</sup> gave nearly 100 Ca<sup>2+</sup>-bound EF-hands (>10 for Z-scores and < 3.0 Å in RMSD), in which most of the EF-hand matches were calmodulin (CaM) and troponin C (TnC). In addition, the structure of <sub>CD</sub>EFhd2 fits well with those of Ca<sup>2+</sup>-peptide-CaM such as PDB IDs 2F2P (Z-score = 11.5, RMSD = 1.6 Å for 79 Cα atoms), 2WEL (Z-score = 11.2, RMSD = 1.74 Å for 79 Cα atoms), 1CDM (Z-score = 10.6, RMSD = 1.7 Å for 73 Cα atoms) and 2LHI (Z-score = 10.5, RMSD = 1.87 Å for 81 Cα atoms).



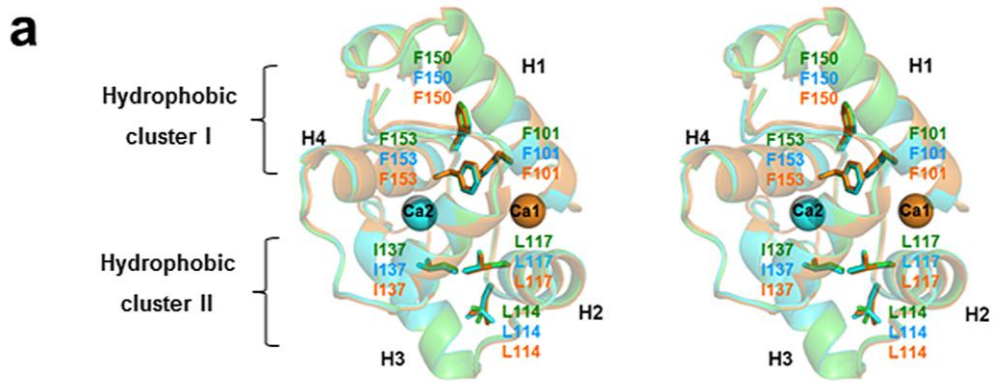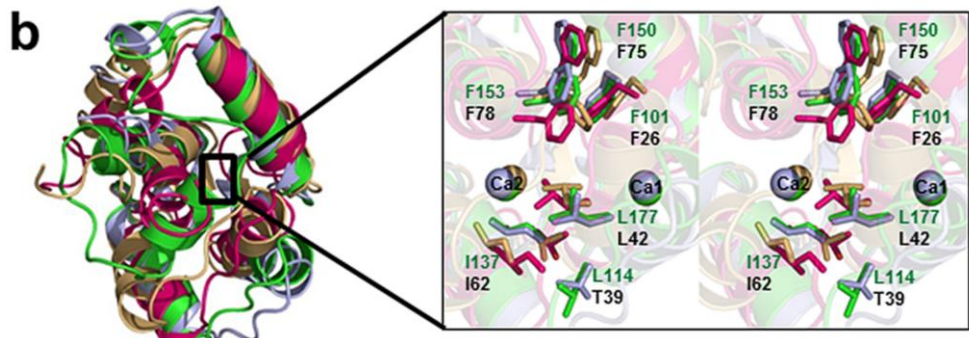

| cdEFhd2           | PDB  | Ca <sup>2+</sup> |     | RMSD   |
|-------------------|------|------------------|-----|--------|
|                   |      | EF1              | EF2 |        |
| TnC<br>(Class IV) | 1AVS | o                | o   | 1.45 Å |
|                   | 1SMG | o                | x   | 2.48 Å |
|                   | 1SKT | x                | x   | 3.13 Å |

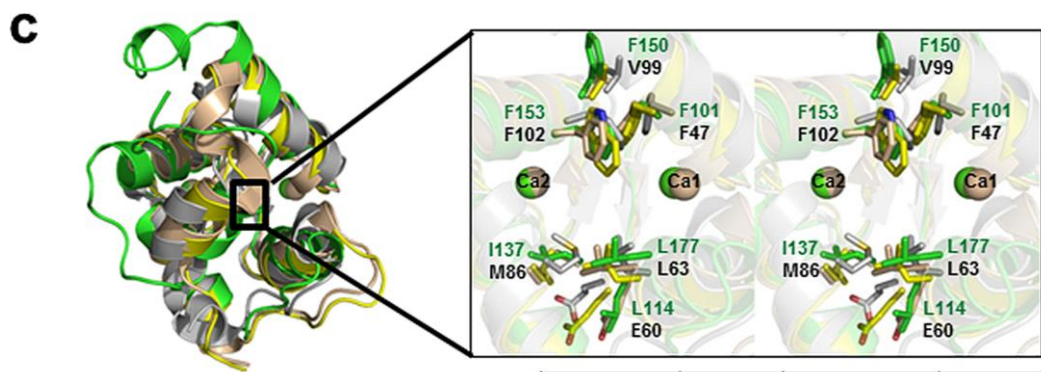

| cdEFhd2            | PDB  | Ca <sup>2+</sup> |     | RMSD   |
|--------------------|------|------------------|-----|--------|
|                    |      | EF1              | EF2 |        |
| PVALB<br>(Class I) | 1RWY | o                | o   | 1.49 Å |
|                    | 1B8L | o                | x   | 1.58 Å |
|                    | 2JWW | x                | x   | 2.28 Å |

**Supplementary Figure S7.** Hydrophobic clusters of EFhd2. (a) Hydrophobic residues within hydrophobic cluster of the Ca<sup>2+</sup>-bound cdEFhd2 (green), cdEFhd2<sup>EF1</sup> (cyan), and cdEFhd2<sup>EF2</sup>

(orange) **(b)** Structural superposition of Ca<sup>2+</sup>-bound <sub>CD</sub>EFhd2 (green) and TnC (1AVS, Ca<sup>2+</sup>-bound form, RMSD = 1.45 Å for 77 Cα atoms; 1smg, one Ca<sup>2+</sup>-bound form, RMSD = 2.48 Å for 72 Cα atoms; 1SKT, apo-form, RMSD = 3.13 Å for 64 Cα atoms)<sup>49-51</sup>. **(b)** Structural superposition of Ca<sup>2+</sup>-bound <sub>CD</sub>EFhd2 (green) and PVALB (1RWY, Ca<sup>2+</sup>-bound form, RMSD = 1.49 Å for 67 Cα atoms; 1B8L, one Ca<sup>2+</sup>-bound form, RMSD = 1.58 Å for 62 Cα atoms; 2JWW, apo-form, RMSD = 2.28 Å for 67 Cα atoms)<sup>52-54</sup>. Residues of Ca-bound and PVALB are labelled green and black, respectively.

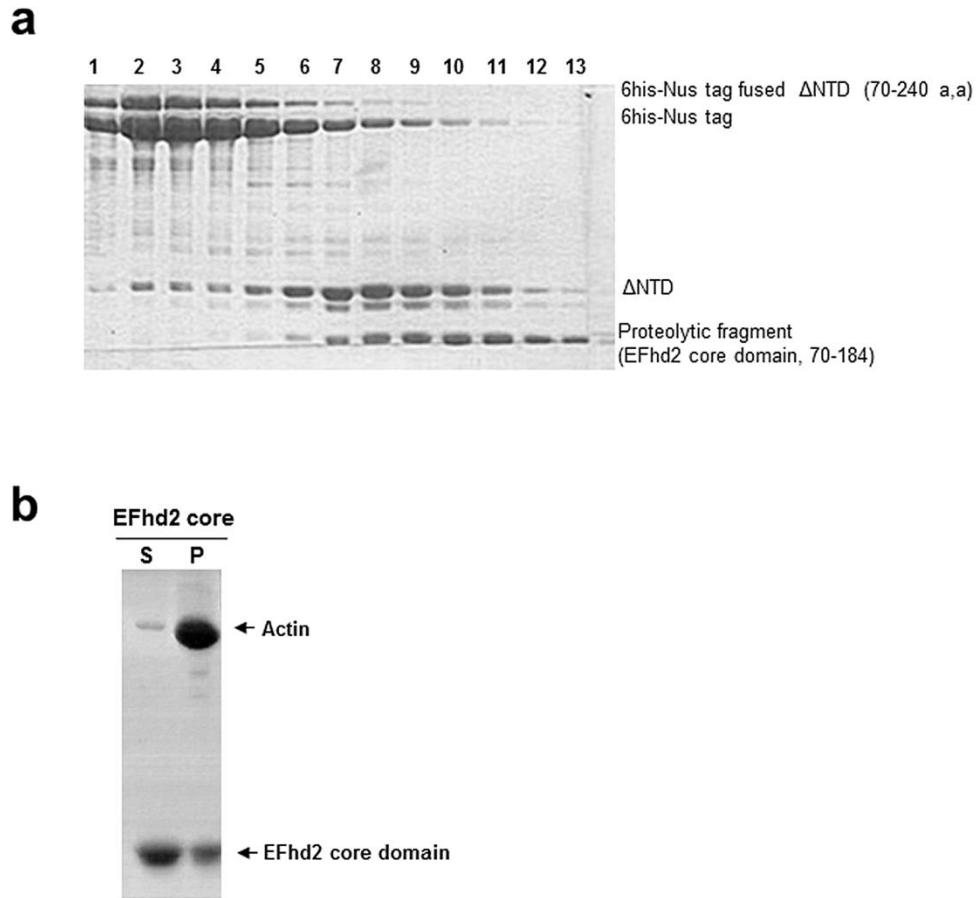

**Supplementary Figure S8. Identification of  $_{CD}EFhd2$ .** (a) All samples collected during the size exclusion chromatography procedure. Purified  $\Delta NTD$  (residues 70–240) was incubated with TEV protease for 10 h at 4 °C prior to buffer exchange through size exclusion chromatography. The resulting fragments were resolved by SDS-PAGE. (b) Co-sedimentation (actin-binding) assay of  $_{CD}EFhd2$ . Protein samples (5  $\mu M$ ) were added to pre-polymerised actin (2  $\mu M$ ) in the presence of 1 mM  $CaCl_2$ .

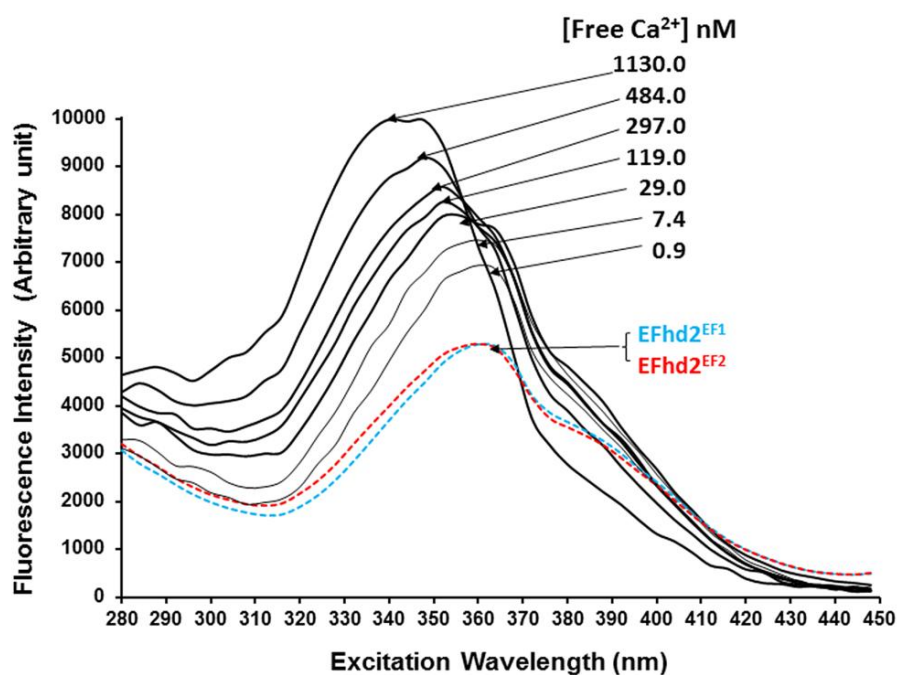

**Supplementary Figure S9.** Fluorescence spectra of fura-2 in the presence of various concentrations of Ca<sup>2+</sup> are represented by black lines. Fluorescence spectra of fura-2 mixed with EFhd2<sup>EF1</sup> and EFhd2<sup>EF2</sup> is represented by cyan and orange dashed line, respectively. Standard solutions to determining Ca<sup>2+</sup> concentration were prepared refer to the method of Kong *et al*<sup>69</sup>.
